# Supplementary material for: Design and efficient synthesis of a new scaffold based on unsymmetrical protoporphyrin IX derivatives for use in SPPS
Source: Royal Society of Chemistry journal article supplement (doi:10.1039/b922012g), 2010-01-01
Supplement: b922012g.pdf [file b922012g.pdf]

# Design and efficient synthesis of a new scaffold based on unsymmetrical protoporphyrin IX derivatives for use in SPPS.

M.-E. Bakleh,<sup>a</sup> V. Sol,<sup>a,b\*</sup>, R. Granet,<sup>a</sup> G. Déléris,<sup>c</sup> P. Krausz.<sup>a</sup>

<sup>a</sup>Permanent address : Université de Limoges, Laboratoire de Chimie des Substances Naturelles, EA 1069 Faculté des Sciences et Techniques, 123 Avenue Albert Thomas, 87060 Limoges, France. [vincent.sol@unilim.fr](mailto:vincent.sol@unilim.fr),<sup>+</sup>

<sup>b</sup>Present address : Department of Chemistry, University of Hull, Cottingham Road, Hull, HU6 7RX, United Kingdom.; E-mail : [v.sol@hull.ac.uk](mailto:v.sol@hull.ac.uk)

<sup>c</sup>Université Bordeaux 2, CNRS UMR5084, Groupe de Chimie Bio-Organique, 146 rue Léo Saignat, 33076 Bordeaux, France.

## Electronique Supplementary Informations

### Chemistry

#### Compound 5 :

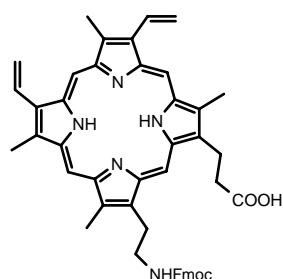

**5**

Resin **4** (83 mg; 36.5  $\mu\text{mol}$ .) was treated with 20 mL of TFA/DCM/TIS (50: 49: 1) mixture at rt for 4 h. Resin was then filtered and washed with TFA (2 x 10 mL). Filtrate and washings were concentrated (to #2 mL) under reduced pressure, then Et<sub>2</sub>O (30mL) was added. The precipitate was filtered off, washed with CHCl<sub>3</sub> (4 x 20 mL) and dried under high vacuum, providing **5** (isomeric mixture) as a deep purple solid (8 mg; 27%). R<sub>f</sub> = 0.33 (DMF/TFA/water; 8:1:1). MALDI-TOF MS calc for C<sub>48</sub> H<sub>45</sub> N<sub>5</sub> O<sub>4</sub> (MH<sup>+</sup>), 756.89 found, 756.81. Anal. (C<sub>48</sub> H<sub>45</sub> N<sub>5</sub> O<sub>4</sub>), 2H<sub>2</sub>O calc C 72.80 , H 6.23 , N 8.84, found C 72.23, H, 6.12 N 8.73 .UV-vis spectrum in DMF:  $\lambda_{\text{max}}$ , nm ( $\epsilon \times 10^{-3} \text{ L}\cdot\text{mol}^{-1}\cdot\text{cm}^{-1}$ ): 409.6 (90.8), 506.8 (9.6), 542.9 (7.5), 576.0 (5.7), 630.6 (2.9). <sup>1</sup>H NMR (400.13 MHz, d<sub>6</sub> DMSO, 25°C)  $\delta$  (ppm): -3.8 (broad s, 2H, NH pyrrole); 3.2 (m, 4H, ProtoIX-CH<sub>2</sub> alkyl), 3.5-3.6 (brs, 12H, CH<sub>3</sub>  $\beta$ -pyrrole), 4.3 (m, 4H, -CH<sub>2</sub>CO and CH<sub>2</sub>NH-), 6.19 (dd,  $J = 11.5$ -1.5 Hz ; 2H, =CH<sub>2</sub>), 6.37 (dd,  $J = 17.8$ -1.5 Hz ; 2H, =CH<sub>2</sub>) ; 7.66 (d,  $J = 7.5$  Hz ; 6H, H-1,8 ; 2,7; 3,6 Fmoc), 7.86 (d,  $J = 7.5$  Hz ; 2H, H-4,5 Fmoc), 8.05 (dd,  $J = 11.5$ -17.8 Hz ; 2H, CH=), 10.16 (s, 1H, H-*meso*), 10.21 (s, 1H, H-*meso*), 10.27 (s, 1H, H-*meso*); 10.29 (s, 1H, H-*meso*).

### Compound 8 :

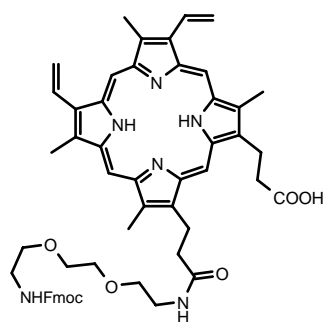

**8**

Resin **7** (79 mg; 56  $\mu\text{mol}$ .) was stirred for 4 h at rt in a mixture of TFA/DCM/TIS (50:49:1), then filtered off and washed with TFA (2 x 10mL). Pooled filtrate and washings were concentrated (to #2 mL) under reduced pressure, then Et<sub>2</sub>O (30 mL) was added. The purple solid was filtered off, washed with CHCl<sub>3</sub> (4 x 20 mL) and dried overnight in vacuum, providing 5 mg of **8** (isomeric mixture) as a purple solid (10%). R<sub>f</sub> = 0.30 (DMF/TFA/water 8:1:1). MALDI-TOF MS calc for C<sub>55</sub> H<sub>58</sub> N<sub>6</sub> O<sub>7</sub> (MH<sup>+</sup>), 916.06 found, 916.09. Anal. (C<sub>55</sub> H<sub>58</sub> N<sub>6</sub> O<sub>7</sub>), 2H<sub>2</sub>O calc C 69.30 , H 6.55 , N 8.81, found C 69.10, H, 6.38 N 8.71 .UV-vis spectrum in DMF:  $\lambda_{\text{max}}$ , nm ( $\epsilon \times 10^{-3}$  L.mol<sup>-1</sup>.cm<sup>-1</sup>): 390.5 (111.8); 490.9 (5.5) ; 523.3 (4.9) ; 569.8 (4.3) ; 621.0 (2.0)

<sup>1</sup>H NMR (400,13 MHz, d<sub>6</sub> DMSO, 25°C)  $\delta$  (ppm): -3.8 (broad s., 2 H, NH pyrrole) ; 3.5-4.3 (m, 8 H, H<sub>alkyl</sub>), 3.5-3.6 (brs, 12 H, CH<sub>3</sub>  $\beta$ -pyrrole), 3.39 (m, 2 H, H<sub>a</sub>), 3.49 (m, 2 H, H<sub>h</sub>), 3.68-3.85 (m, 8 H, H<sub>b, c, d, e</sub>) ; 4.1 (s, 1 H, NHCO), , 6.19 (dd,  $J=11.5-1.5$  Hz, 2 H, =CH<sub>2</sub>), 6.36 (dd,  $J=17.8-1.5$  Hz, 2 H, =CH<sub>2</sub>), 7.66 (d,  $J=7.5$  Hz, 6 H, H<sub>aryliques 1,8 ; 2,7 et 3,6</sub>) ; 7.86 (d,  $J=7,5$  Hz, 2 H, H<sub>aryliques 4,5</sub>), 8.05 (dd,  $J=11.5-17.8$  Hz, 2 H, CH=), 10.16 (s, 1 H, H<sub>meso-</sub>), 10.21 (s, 1 H, H-*meso*), 10.27 (s, 1 H, H-*meso*), 10.29 (s, 1H, H-*meso*).
